# Supplementary material for: Study of colored lacquerwares from Zenghou Yi Tomb in Early Warring States
Source: Royal Society of Chemistry journal article supplement (doi:10.1039/d1nj00699a), 2021-01-01
Supplement: d1nj00699a1.pdf [file d1nj00699a1.pdf]

## Study of Colored Lacquerwares from Zenghou Yi Tomb in early Warring States

Authors' name: Meng Wu<sup>1</sup>, Yunfan Zhang<sup>2</sup>, Bingjian Zhang<sup>1,3</sup>, Lan Li<sup>4</sup>

Publication: NEW JOURNAL OF CHEMISTRY

### Supplementary Information

Table.S1 Sensitivity and specificity of the antibodies

| Anti-X Antibody                        | Ovalbumin | Casein    | Collagen I | Lacquer glycoprotein |
|----------------------------------------|-----------|-----------|------------|----------------------|
| Dilution                               | 1:10000   | 1:4000    | 1:4000     | 1:20000              |
| Dilution of HRP- IgG(H+L)              | 1:10000   | 1:10000   | 1:4000     | 1:20000              |
| Minimum detection ( $\mu\text{g/ml}$ ) | $10^{-5}$ | $10^{-6}$ | $10^{-3}$  | $10^{-6}$            |
| Natural Adhesive                       |           |           |            |                      |
| Egg                                    | +++       | -         | -          | -                    |
| Milk                                   | -         | +++       | -          | -                    |
| Gelatin                                | -         | -         | +++        | -                    |
| Lacquer                                | -         | -         | -          | +++                  |
| Peach gum                              | -         | -         | -          | -                    |
| Arabic aum                             | -         | -         | -          | -                    |
| Astragalus Gum                         | -         | -         | -          | -                    |
| Rosin                                  | -         | -         | -          | -                    |
| Shellac                                | -         | -         | -          | -                    |
| Glutinous rice                         | -         | -         | -          | -                    |
| Wheat flour                            | -         | -         | -          | -                    |
| Bletilla Gum                           | -         | -         | -          | -                    |
| Algin                                  | -         | -         | -          | -                    |

Pre-experiments of ELISA were carried out to optimize the dilution of antibodies and determine their sensitivity. The results were shown in Table.S1, Figure.S1, Figure.S2, Figure.S3 and Figure.S4.

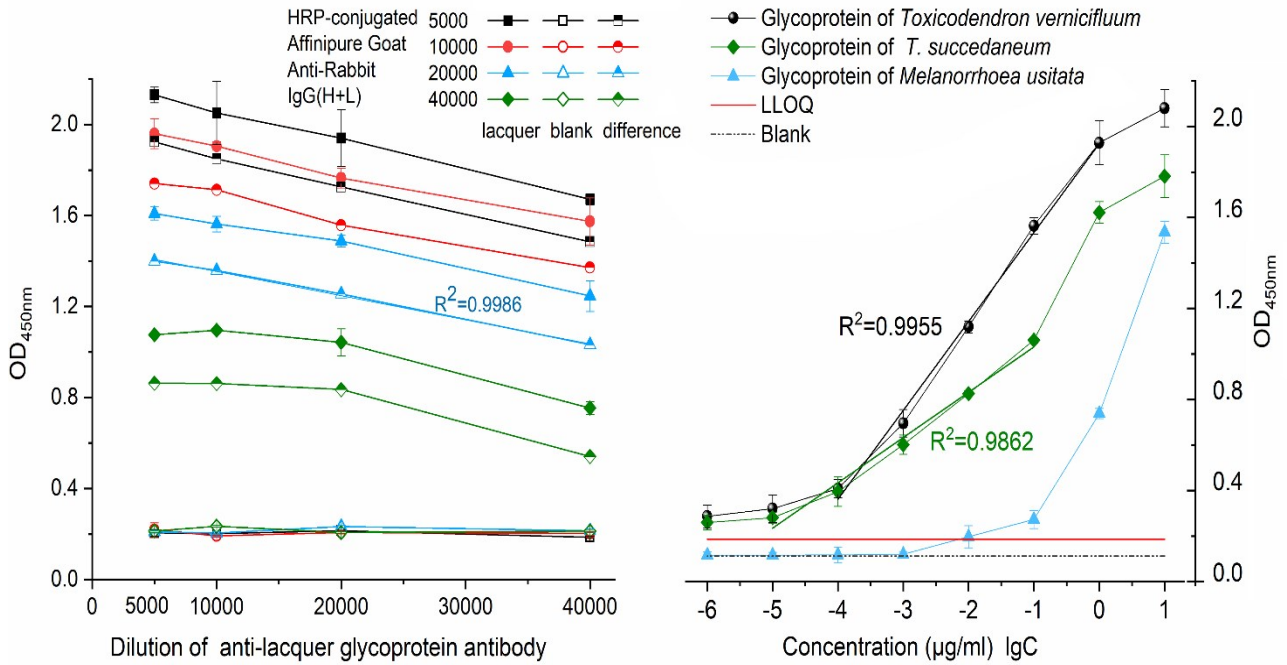

Figure.S1 Optimized dilution and sensitivity of anti-lacquer glycoprotein antibody

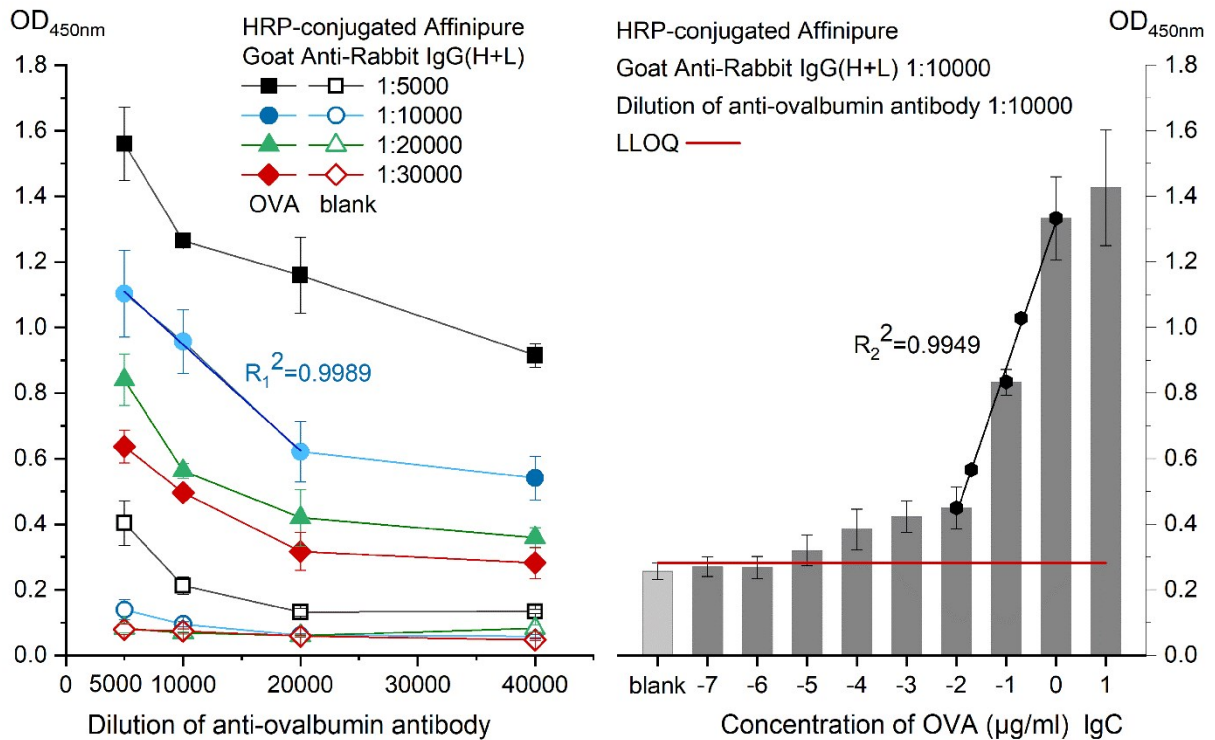

Figure.S2 Optimized dilution and sensitivity of anti-ovalbumin antibody

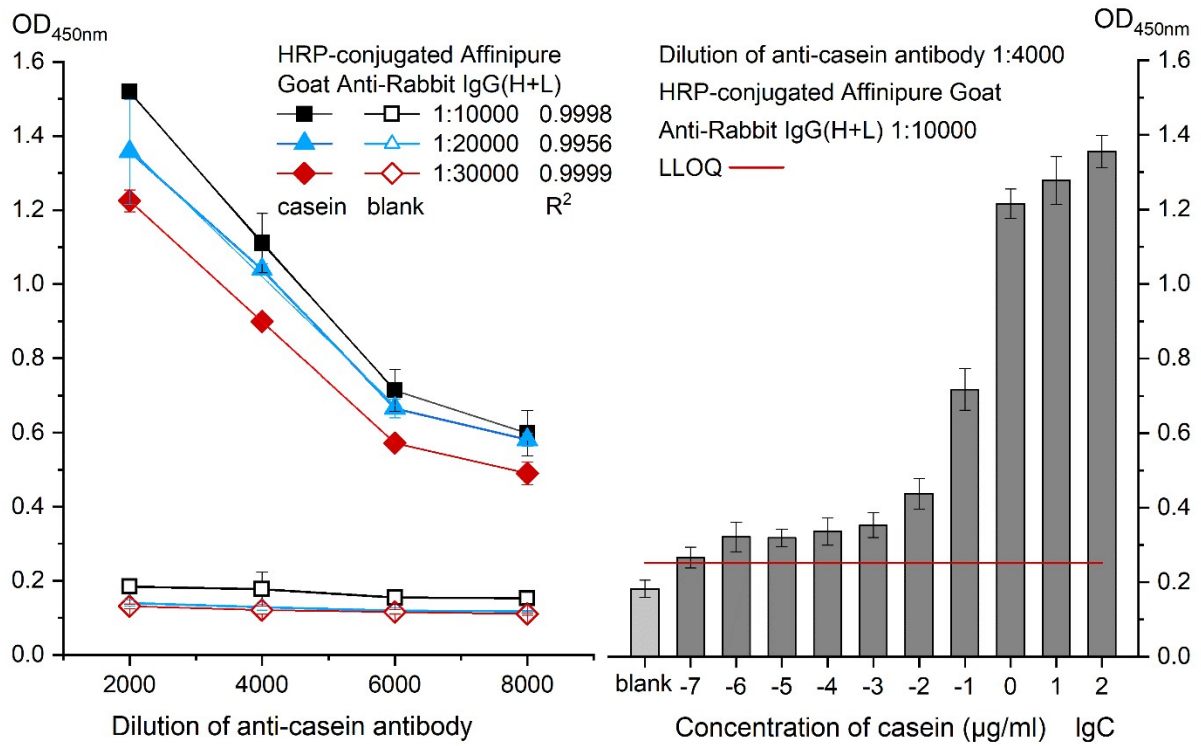

Figure.S3 Optimized dilution and sensitivity of anti-casein antibody

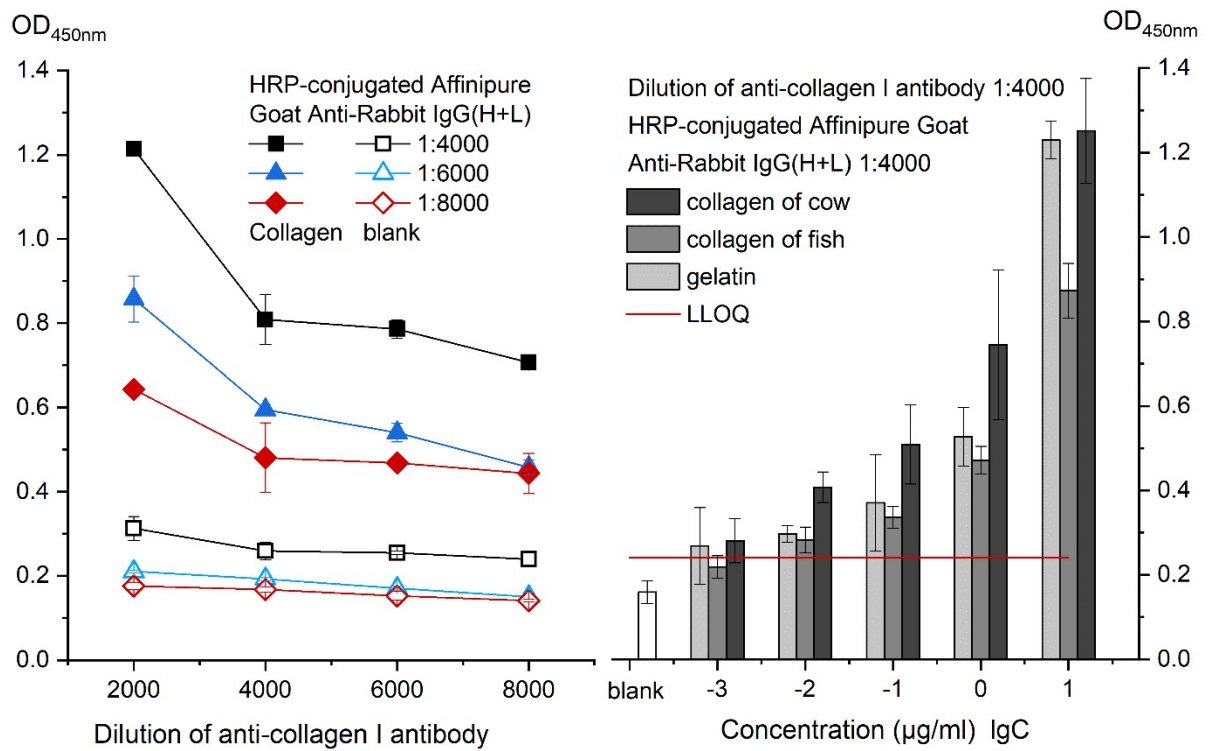

Figure.S4 Optimized dilution and sensitivity of anti-collagen antibody
